# Supplementary material for: Renal Medullary Carcinomas Harbor a Distinct Methylation Phenotype and Display Aberrant Methylation of Genes Related to Early Nephrogenesis
Source: Cancers (Basel). 2022 Oct 14;14(20):5044. doi: 10.3390/cancers14205044 (PMC9599670; doi:10.3390/cancers14205044)
Supplement: Supplementary file 1 [file cancers-14-05044-s001.zip › Figure S1.pdf]

A

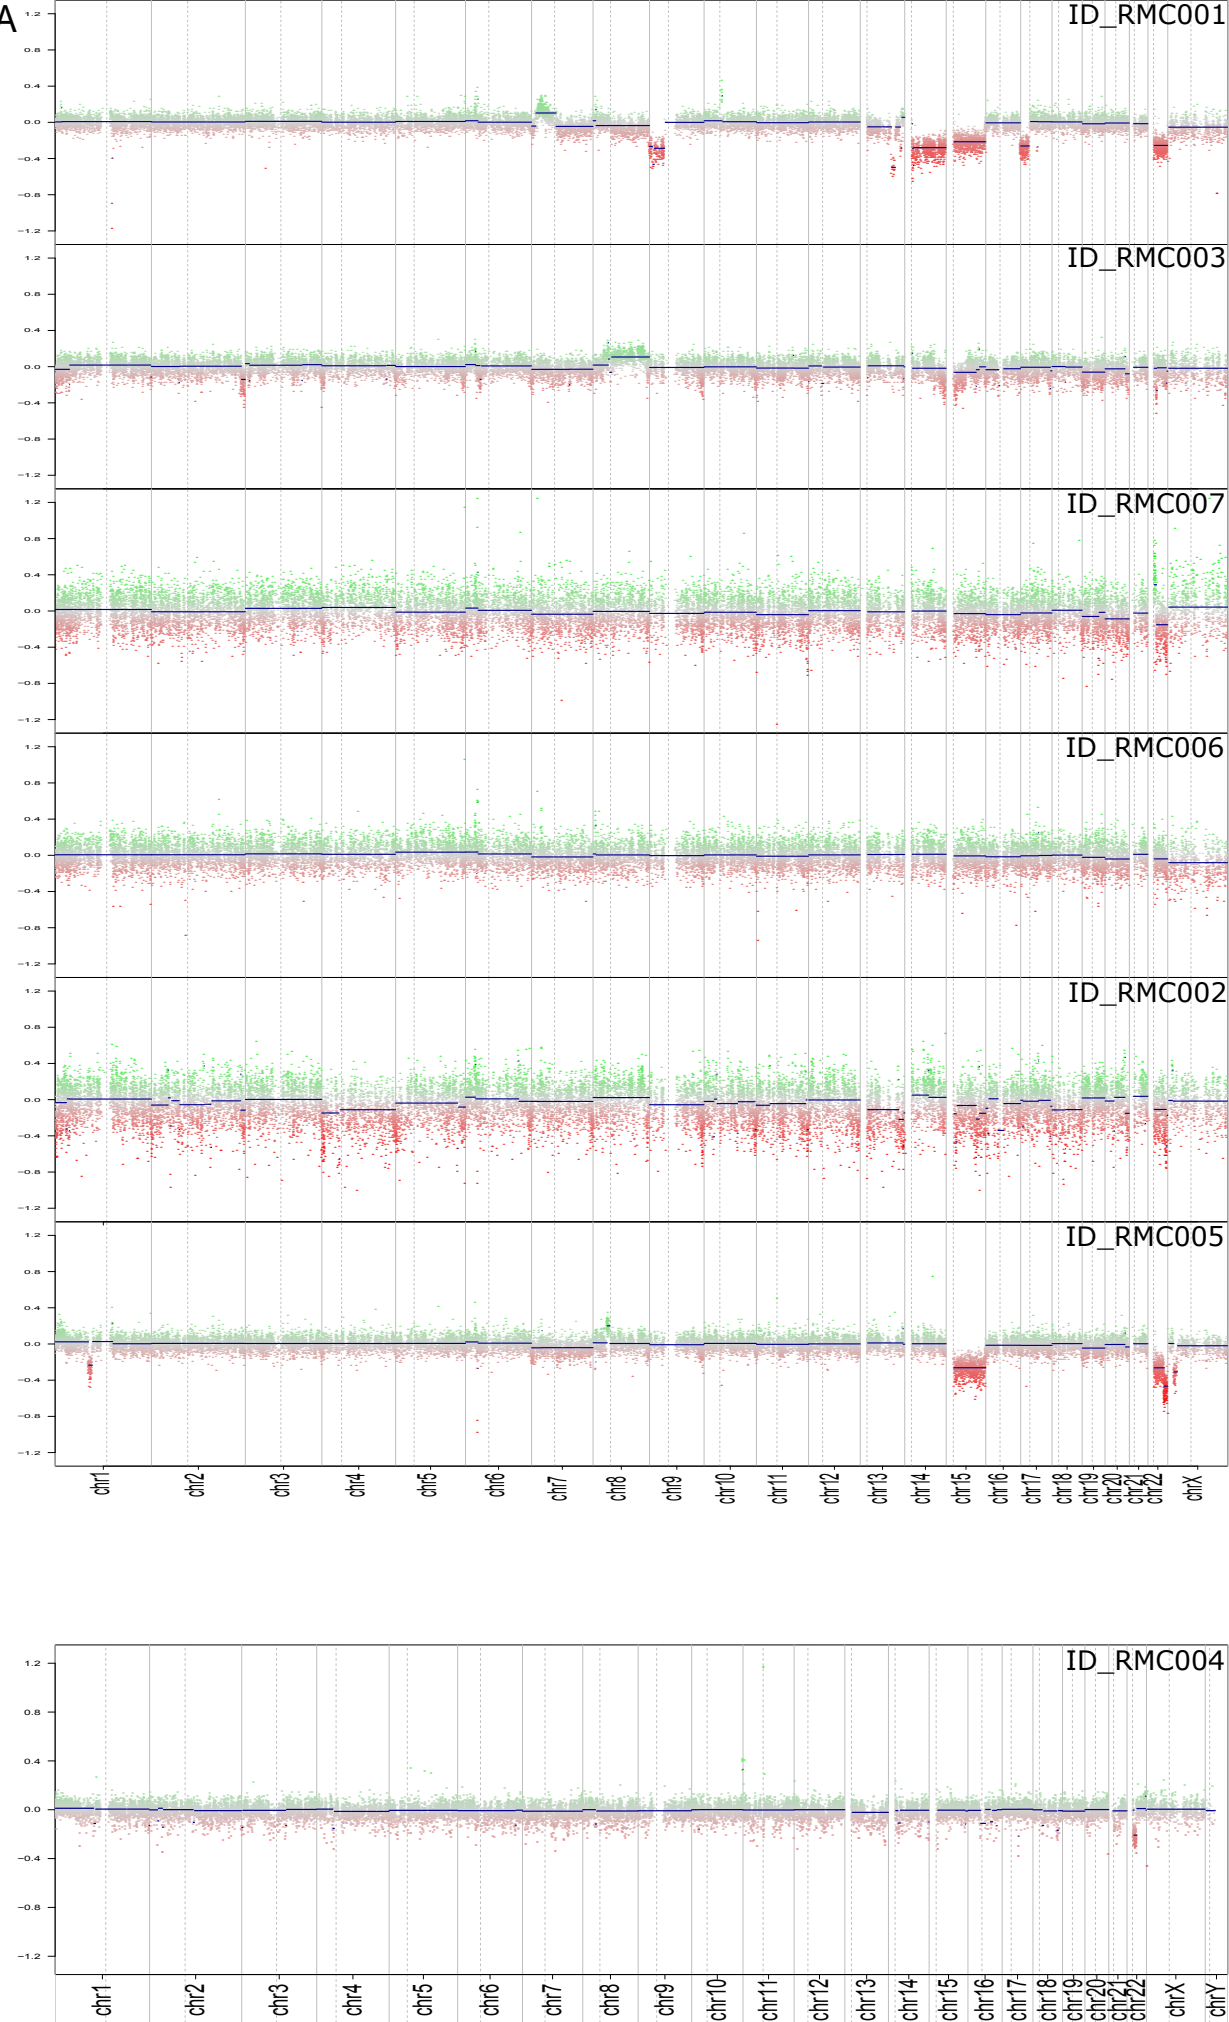

B

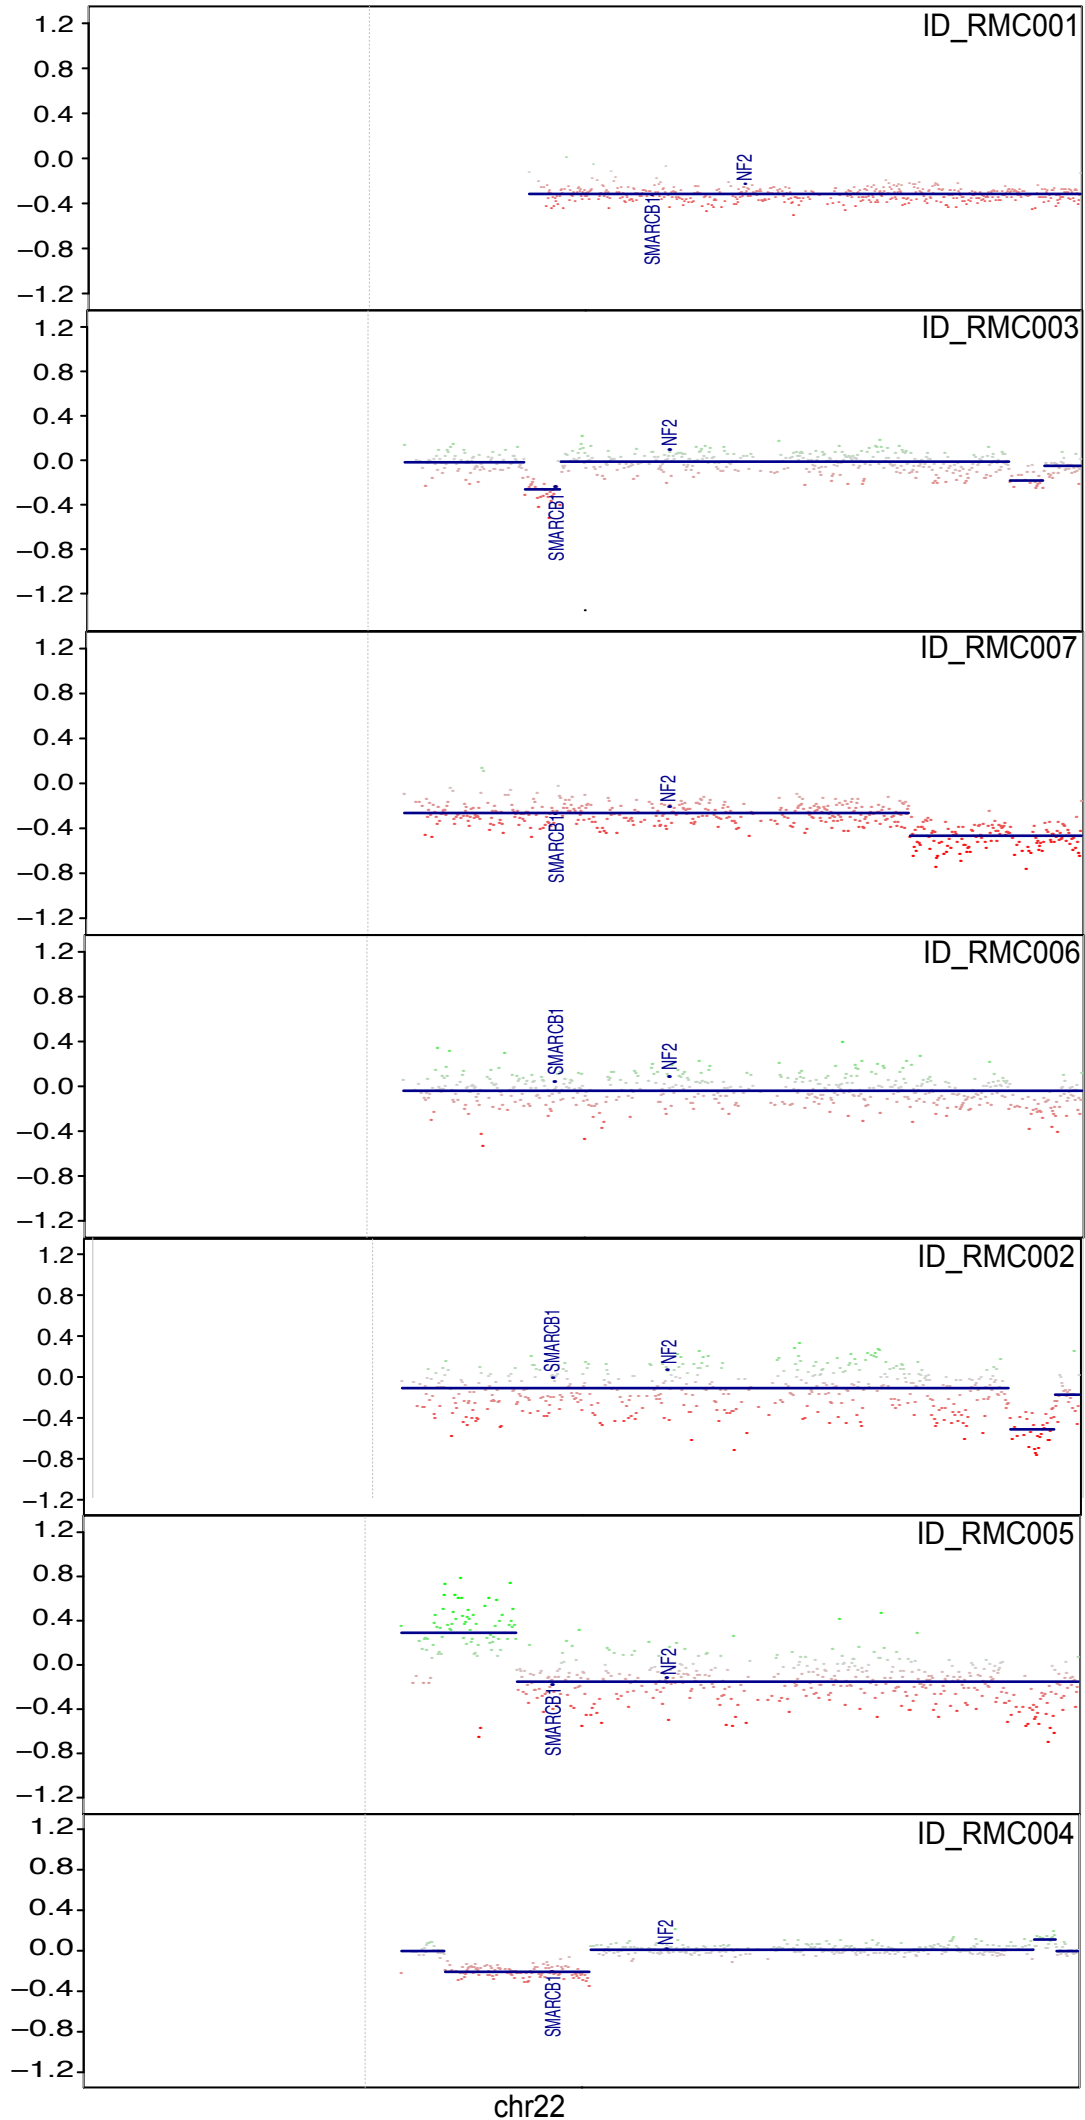

**Supplementary Figure S1:** Copy number profiles from all RMC patents analysed in this study. (A) Copy number profiles for all chromosomes. (B) Copy number profiles for chr22.
