# Supplementary material for: Renal Medullary Carcinomas Harbor a Distinct Methylation Phenotype and Display Aberrant Methylation of Genes Related to Early Nephrogenesis
Source: Cancers (Basel). 2022 Oct 14;14(20):5044. doi: 10.3390/cancers14205044 (PMC9599670; doi:10.3390/cancers14205044)
Supplement: Supplementary file 1 [file cancers-14-05044-s001.zip › Figure S3.pdf]

## Neutrophil Cell surface marker

Lin

CD11b

CD44

CD33

CD55

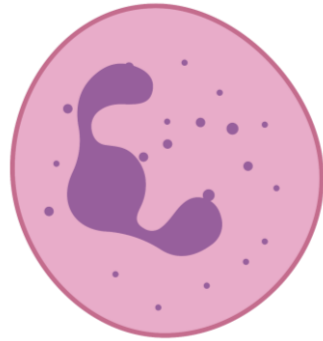

## Tumor-associated Neutrophils

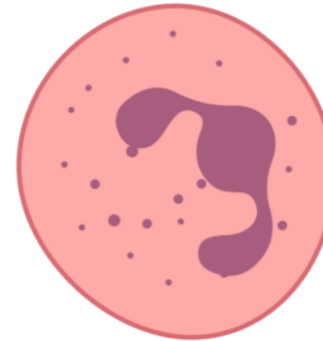

CXCL1

CCL17

CXCL8

Lower in RMCs

$P < 0.001$

$p < 0.05$

Higher in RMCs

$P < 0.001$

$p < 0.05$

KIPR &  
KIPC

Supplementary figure S3: Differentially methylated genes encoding for neutrophil cell surface markers and markers for tumor-associated neutrophils in RMCs compared to KIPRs and KIPCs.
