# Supplementary material for: Renal Medullary Carcinomas Harbor a Distinct Methylation Phenotype and Display Aberrant Methylation of Genes Related to Early Nephrogenesis
Source: Cancers (Basel). 2022 Oct 14;14(20):5044. doi: 10.3390/cancers14205044 (PMC9599670; doi:10.3390/cancers14205044)
Supplement: Supplementary file 1 [file cancers-14-05044-s001.zip › Figure S5.pdf]

GREM1

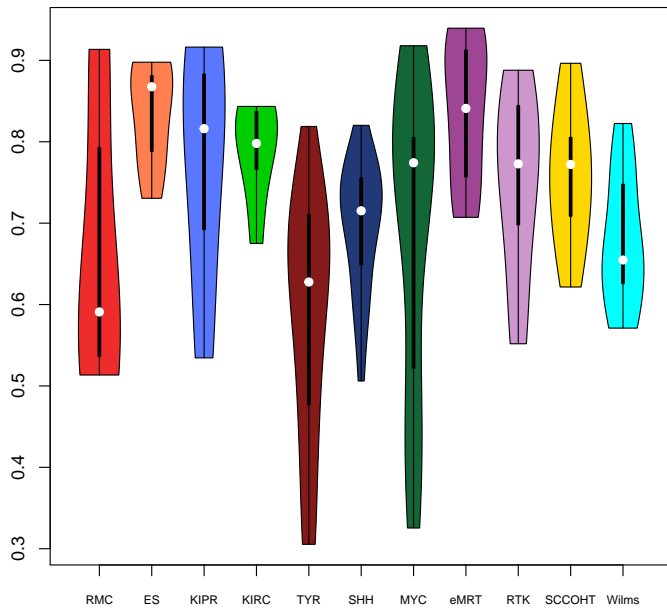

HOXD11

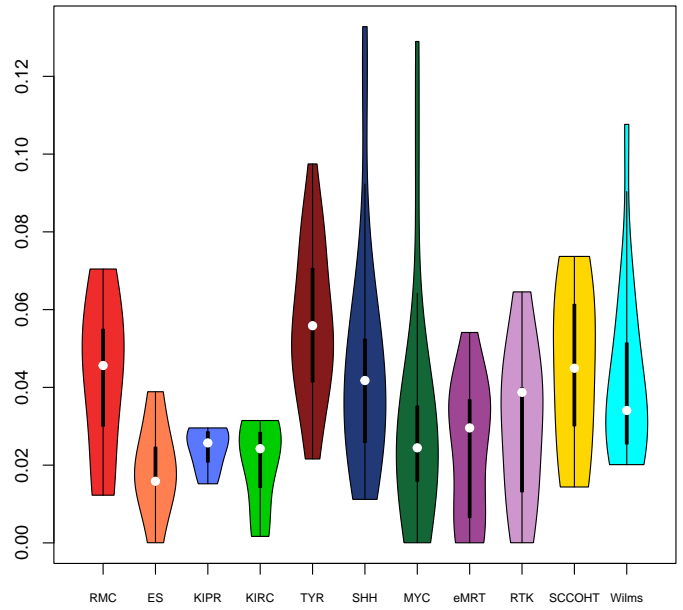

IL6

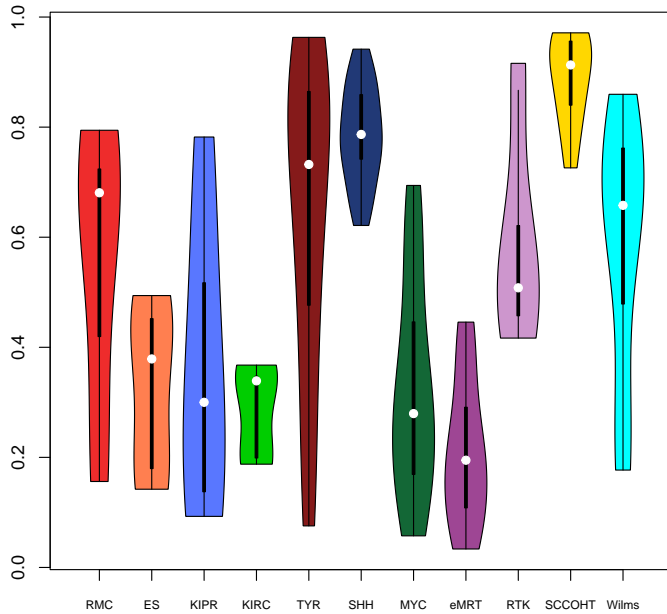

EYA1

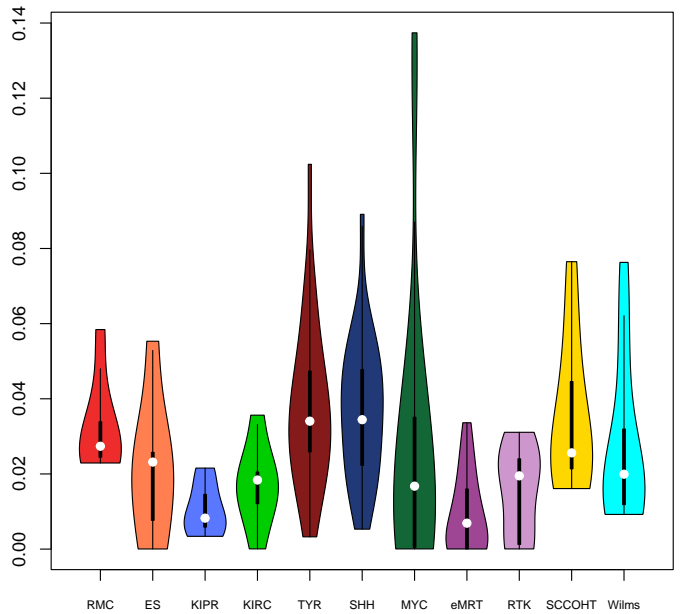

**Supplementary Figure S5:** Violin Plots displaying exemplary genes, that are significantly different methylated in RMCs compared to ES in the top row (GREM1 - ES mean = 0.833, RMC mean = 0.67,  $p = 0.0482$ ; HOXD11 - ES mean = 0.0191, RMC mean = 0.0426,  $p = 0.029$ ) and genes without significant differences in the bottom row ( IL6 - ES mean = 0.325, RMC mean = 0.5597,  $p = 0.061$ ; EYA1 - ES mean = 0.021, RMC mean = 0.0322,  $p = 0.21$ )
