# Supplementary material for: Renal Medullary Carcinomas Harbor a Distinct Methylation Phenotype and Display Aberrant Methylation of Genes Related to Early Nephrogenesis
Source: Cancers (Basel). 2022 Oct 14;14(20):5044. doi: 10.3390/cancers14205044 (PMC9599670; doi:10.3390/cancers14205044)
Supplement: Supplementary file 1 [file cancers-14-05044-s001.zip › Supplementary Table S1.pdf]

# Supplementary Table S1

Renal medullary carcinoma cases and corresponding IDAT files

| <b>ID (Jia et al., 2019)</b> | <b>IDAT</b>         | <b>Patho ID</b> | <b>IDs for cases from this study</b> |
|------------------------------|---------------------|-----------------|--------------------------------------|
|                              | 204375420076_R02C01 | S17_514_3       | ID_RMC001                            |
|                              | 204375420079_R08C01 | S19_13485       | ID_RMC002                            |
|                              | 204375420079_R06C01 | S20_20897       | ID_RMC003                            |
|                              | 203033970041_R01C01 | I123_017        | ID_RMC004                            |
| Case #6                      | 204375420088_R02C01 | S18_16454       | ID_RMC005                            |
| Case #2                      | 204375420079_R07C01 | S07_3938        | ID_RMC006                            |
| Case #9                      | 204375420088_R01C01 | S06_1616G       | ID_RMC007                            |
